# Supplementary material for: Risk-Based Mapping Tools for Surveillance and Control of the Invasive Mosquito Aedes Albopictus in Switzerland
Source: Preprints.org preprint supplement (doi:10.20944/preprints202202.0035.v1), 2022-02-02
Supplement: Supplementary file 1 [file supplementary]

**Table S1: Candidate predictors used for modelling *Ae. albopictus* habitat suitability**

| Category                                     | Source                              | Predictor                                                                 | Abbreviation |
|----------------------------------------------|-------------------------------------|---------------------------------------------------------------------------|--------------|
| Meteorological factors                       | MeteoSwiss spatial climate datasets | 5 <sup>th</sup> percentile of the minimum temperature in the cold season  | cTmin_p5     |
|                                              |                                     | 25 <sup>th</sup> percentile of the minimum temperature in the cold season | cTmin_p25    |
|                                              |                                     | 75 <sup>th</sup> percentile of the minimum temperature in the cold season | cTmin_p75    |
|                                              |                                     | 95 <sup>th</sup> percentile of the minimum temperature in the cold season | cTmin_p95    |
|                                              |                                     | Average of the minimum temperature in the cold season                     | cTmin_avg    |
|                                              |                                     | 5 <sup>th</sup> percentile of the maximum temperature in the cold season  | cTmax_p5     |
|                                              |                                     | 25 <sup>th</sup> percentile of the maximum temperature in the cold season | cTmax_p25    |
|                                              |                                     | 75 <sup>th</sup> percentile of the maximum temperature in the cold season | cTmax_p75    |
|                                              |                                     | 95 <sup>th</sup> percentile of the maximum temperature in the cold season | cTmax_p95    |
|                                              |                                     | Average of the maximum temperature in the cold season                     | cTmax_avg    |
|                                              |                                     | 5 <sup>th</sup> percentile of the mean temperature in the cold season     | cTmean_p5    |
|                                              |                                     | 25 <sup>th</sup> percentile of the mean temperature in the cold season    | cTmean_p25   |
|                                              |                                     | 75 <sup>th</sup> percentile of the mean temperature in the cold season    | cTmean_p75   |
|                                              |                                     | 95 <sup>th</sup> percentile of the mean temperature in the cold season    | cTmean_p95   |
|                                              |                                     | Average of the mean temperature in the cold season                        | cTmean_avg   |
|                                              |                                     | 5 <sup>th</sup> percentile of the minimum temperature in the warm season  | wTmin_p5     |
|                                              |                                     | 25 <sup>th</sup> percentile of the minimum temperature in the warm season | wTmin_p25    |
|                                              |                                     | 75 <sup>th</sup> percentile of the minimum temperature in the warm season | wTmin_p75    |
|                                              |                                     | 95 <sup>th</sup> percentile of the minimum temperature in the warm season | wTmin_p95    |
|                                              |                                     | Average of the minimum temperature in the warm season                     | wTmin_avg    |
|                                              |                                     | 5 <sup>th</sup> percentile of the maximum temperature in the warm season  | wTmax_p5     |
|                                              |                                     | 25 <sup>th</sup> percentile of the maximum temperature in the warm season | wTmax_p25    |
|                                              |                                     | 75 <sup>th</sup> percentile of the maximum temperature in the warm season | wTmax_p75    |
|                                              |                                     | 95 <sup>th</sup> percentile of the maximum temperature in the warm season | wTmax_p95    |
|                                              |                                     | Average of the maximum temperature in the warm season                     | wTmax_avg    |
|                                              |                                     | 5 <sup>th</sup> percentile of the mean temperature in the warm season     | wTmean_p5    |
|                                              |                                     | 25 <sup>th</sup> percentile of the mean temperature in the warm season    | wTmean_p25   |
|                                              |                                     | 75 <sup>th</sup> percentile of the mean temperature in the warm season    | wTmean_p75   |
|                                              |                                     | 95 <sup>th</sup> percentile of the mean temperature in the warm season    | wTmean_p95   |
|                                              |                                     | Average of the mean temperature in the warm season                        | wTmean_avg   |
|                                              |                                     | 75 <sup>th</sup> percentile of the precipitations in the cold season      | cRAIN_p75    |
|                                              |                                     | 95 <sup>th</sup> percentile of the precipitations in the cold season      | cRAIN_p95    |
| Average of precipitations in the cold season | cRAIN_avg                           |                                                                           |              |

| Category                                                                               | Source                                            | Predictor                                                                                                              | Abbreviation |
|----------------------------------------------------------------------------------------|---------------------------------------------------|------------------------------------------------------------------------------------------------------------------------|--------------|
|                                                                                        |                                                   | 75 <sup>th</sup> percentile of the precipitations in the warm season                                                   | wRAIN_p75    |
|                                                                                        |                                                   | 95 <sup>th</sup> percentile of the precipitations in the warm season                                                   | wRAIN_p95    |
|                                                                                        |                                                   | Average of precipitations in the warm season                                                                           | wRAIN_avg    |
|                                                                                        |                                                   | Maximum Tmin (daily minimum temperature) observed during the two-week period of the year with the lowest maximum Tmin  | minMmaxTmin  |
|                                                                                        |                                                   | Average Tmin (daily minimum temperature) observed during the two-week period of the year with the lowest average Tmin  | minMavgTmin  |
|                                                                                        |                                                   | Minimum Tmax (daily maximum temperature) observed during the two-week period of the year with the highest minimum Tmax | maxMminTmax  |
|                                                                                        |                                                   | Average Tmax (daily maximum temperature) observed during the two-week period of the year with the highest average Tmax | maxMavgTmax  |
|                                                                                        |                                                   | Average precipitation observed during the two-week period of the warm season with the highest average precipitations   | maxMavgRAIN  |
|                                                                                        |                                                   | Average precipitation observed during the two-week period of the warm season with the lowest average precipitation     | minMavgRAIN  |
| Terrain morphology                                                                     | DHM25 / 200m (Swiss Federal Office of Topography) | Elevation in m.a.s.l.                                                                                                  | elevation    |
|                                                                                        |                                                   | Land orientation                                                                                                       | aspect       |
|                                                                                        |                                                   | Slope                                                                                                                  | slope        |
| Land cover types                                                                       | CORINE Land Cover 2012 (CLC-CH 2012)              | Continuous urban fabric                                                                                                | clc111       |
|                                                                                        |                                                   | Discontinuous urban fabric                                                                                             | clc112       |
|                                                                                        |                                                   | Industrial or commercial units                                                                                         | clc121       |
|                                                                                        |                                                   | Road and rail networks and associated land                                                                             | clc122       |
|                                                                                        |                                                   | Port areas                                                                                                             | clc123       |
|                                                                                        |                                                   | Airports                                                                                                               | clc124       |
|                                                                                        |                                                   | Mineral extraction sites                                                                                               | clc131       |
|                                                                                        |                                                   | Dump sites                                                                                                             | clc132       |
|                                                                                        |                                                   | Construction sites                                                                                                     | clc133       |
|                                                                                        |                                                   | Green urban areas                                                                                                      | clc141       |
|                                                                                        |                                                   | Sport and leisure facilities                                                                                           | clc142       |
|                                                                                        |                                                   | Non-irrigated arable land                                                                                              | clc211       |
|                                                                                        |                                                   | Vineyards                                                                                                              | clc221       |
|                                                                                        |                                                   | Fruit trees and berry plantations                                                                                      | clc222       |
|                                                                                        |                                                   | Pastures                                                                                                               | clc231       |
|                                                                                        |                                                   | Complex cultivation                                                                                                    | clc242       |
| Land principally occupied by agriculture, with significant areas of natural vegetation | clc243                                            |                                                                                                                        |              |

| <b>Category</b> | <b>Source</b>            | <b>Predictor</b>                                                                                       | <b>Abbreviation</b> |
|-----------------|--------------------------|--------------------------------------------------------------------------------------------------------|---------------------|
|                 |                          | Broad-leaved forest                                                                                    | clc311              |
|                 |                          | Coniferous forest                                                                                      | clc312              |
|                 |                          | Mixed forest                                                                                           | clc313              |
|                 |                          | Natural grassland                                                                                      | clc321              |
|                 |                          | Moors and heathland                                                                                    | clc322              |
|                 |                          | Transitional woodland shrub                                                                            | clc324              |
|                 |                          | Beaches, dunes, and sand plains                                                                        | clc331              |
|                 |                          | Bare rocks                                                                                             | clc332              |
|                 |                          | Sparsely vegetated areas                                                                               | clc333              |
|                 |                          | Burnt areas                                                                                            | clc334              |
|                 |                          | Glaciers and perpetual snow                                                                            | clc335              |
|                 |                          | Inland marshes                                                                                         | clc411              |
|                 |                          | Peatbogs                                                                                               | clc412              |
|                 |                          | Water courses                                                                                          | clc511              |
|                 |                          | Water bodies                                                                                           | clc512              |
| Social factors  | STATPOP2016<br>(GEOSTAT) | Total human population                                                                                 | total population    |
| Social factors  | OSRM, OSM                | Road-based distance in minutes of travel by car from the nearest cell established in the previous year | carD                |
